# Supplementary material for: Skin-like cryogel electronics from suppressed-freezing tuned polymer amorphization
Source: PubMed Central journal article supplement (PMC10435499; doi:10.1038/s41467-023-40792-y), 2023-08-17
Supplement: 41467_2023_40792_MOESM3_ESM.pdf [file 41467_2023_40792_MOESM3_ESM.pdf]

## **Description of Additional Supplementary Files**

File Name: **Supplementary Movie 1**

Caption: Anti-freezing ability in liquid nitrogen

File Name: **Supplementary Movie 2**

Caption: Uniaxial stretching of suppressed cryogels and common cryogels

File Name: **Supplementary Movie 3**

Caption: Suppressed cryogels with ultrasoftness, transparency and self-adhesiveness

File Name: **Supplementary Movie 4**

Caption: Instantaneous self-healing of suppressed cryogels

File Name: **Supplementary Movie 5**

Caption: Stretchability of artificial nerve fibers

File Name: **Supplementary Movie 6**

Caption: The working ability of artificial nerve fibers in ultra-low temperature environment
